# Supplementary material for: Outsourcing Medical Data Analyses: Can Technology Overcome Legal, Privacy, and Confidentiality Issues?
Source: PubMed Central journal article supplement (PMC3877744; doi:10.2196/jmir.2471), 2013-12-16
Supplement: jmir_v15i12e283_app1.pdf [file jmir_v15i12e283_app1.pdf]

## Multimedia Appendix 1: Formal Description of Data-protecting Algorithm

Suppose we have the original data stored in a flat file  $FF$ , which is a usual format for data analytic tools [1]. A flat file is representing a single table  $T$ . A table is consisting of a *table scheme*  $T$ , which is invariant over the life of the table, and a set of *tuples* consistent with the scheme. Such a set of tuples is called the *current value* or *instance* of table  $T$ . A table schema of  $T$ ,  $TS$ , is described by a finite set of *attributes*,  $TS = \{A_1, A_2, \dots, A_N\}$ . Each attribute  $A_i$  is the name of a role played by some domain  $D_i$  in the relation schema  $TS$ . We assume that any attribute name  $A_i$  appears only once within table schema  $TS$ .  $D_i$  is called the domain of  $A_i$  and is denoted by  $D_i = dom(A_i)$ . A *domain* is simply a set of values and can be finite or infinite. In a relational table, we have a set of domains,  $D = \{D_1, \dots, D_k, \dots, D_K\}$ . A *table*  $T$  consists of a table scheme  $TS$  and a set of  $N$ -tuples  $t$ ,  $t = \{t_1, \dots, t_m, \dots, t_M\}$ . Each  $N$ -tuple  $t_m$  (belonging to the search table  $T$ ) is an ordered list of  $N$  values,  $t_m = \langle v_{m1}, \dots, v_{mn}, \dots, v_{mN} \rangle$ , where each value  $v_{mn}$  is an element of  $dom(A_n)$ , or is a special *null* value. The  $n^{th}$  value ( $v_{mn}$ ) of the  $m^{th}$  tuple ( $t_m$ ) of search table  $T$ , which corresponds to the attribute  $A_n$ , is referred to as  $v_{mn}=t_m[A_n]$ .

The data-protecting algorithm is described formally as follows.

*Definition 1:* Let  $D_n$  and  $D_n^\#$  be sets. A *function* from  $D_n$  into  $D_n^\#$  is a subset  $F$  of  $D_n \times D_n^\#$  such that for each element  $a \in D_n$  there is exactly one element  $b \in D_n^\#$  such that  $(a, b) \in F$ . Set  $D_n$  corresponds to domains of relation schema  $TS$ .

*Definition 2:* Let  $D^\#$  be a set of domains, such that  $D^\# = \{D_n^\# | |D_n^\#| = |D_n|\}$ . Let  $D_n \rightarrow D_n^\#$  be a function, and  $F^D = \{f_n()\}$  be a set of transformations  $f_n$ . Transformation  $f_n$  is said to transform  $D_n$  onto  $D_n^\#$ , if

1.  $\forall b \exists a: f_n(a) = b$
2.  $f_n(a_1) = f_n(a_2) \Leftrightarrow a_1 = a_2$

In definition 2 we have defined a set of functions that encrypt the original values to encrypted ones. If a value comes from a categorical domain, the function  $f_i$  is simply a strong encryption algorithm, e.g. those approved by National Institute of Standards and Technology (NIST): TDEA (3DES) [2], AES [3], or Skipjack [4]. If a value is numeric, the function needs to be chosen such that it scrambles the original numbers and that it preserves statistical properties of data [5].

*Definition 3:* Let  $RN: String \rightarrow String$  be a function such that

1.  $\forall b \exists a: RN(a) = b$
2.  $RN(a_1) = RN(a_2) \Leftrightarrow a_1 = a_2$

This way we defined a function that transforms attribute names into new (encrypted) values. The function  $RN$  is a rename operation.

The functions  $RN$  and  $F^D$ , together with corresponding keys, are secret, known only by the data owner; the attacker might guess the functions so the security should rely only on secrecy of the keys [6].

## References

1. Witten IH and Frank E. Data Mining: Practical machine learning tools and techniques. 2nd ed. Morgan Kaufmann; 2005. ISBN: 0120884070
2. NIST. Recommendation for the Triple Data Encryption Algorithm (TDEA) Block Cipher. Springfield, VA, USA: Federal Information Processing Standards Special Publication 800-67 (FIPS PUB 800-67); 2012.
3. NIST. Advanced Encryption Standard (AES). Springfield, VA, USA: Federal Information Processing Standards Publication 197 (FIPS PUB 197); 2001.

4. NIST. Escrowed Encryption Standard (EES); SKIPJACK and KEA Algorithm Specifications. Springfield, VA, USA: Federal Information Processing Standards Publication 185 (FIPS PUB 185); 1998.
5. Adam NR and Wortmann JC. Security-control methods for statistical databases: a comparative study. *ACM Comput Surv* 1989; 21(4): 515-556. DOI: 10.1145/76894.76895.
6. Stallings W. *Cryptography and Network Security, Principles and Practices*. 4th ed. Prentice Hall; 2006. ISBN: 0131873164
